1 **RESEARCH ARTICLE [5000 words]**

2 **Breeding at higher latitude as measured by stable isotope is associated with higher**  
3 **photoperiod threshold and delayed reproductive development in a songbird**

4

5 Singh, D.<sup>1,2,#</sup>, Reed, S.R.<sup>1</sup>, Kimmitt, A.A.<sup>1</sup>, Alford K. A.<sup>1</sup>, Ketterson, E.D.<sup>1,2,#</sup>

6

7 1. Biology Department, Indiana University, Bloomington 47405, IN

8 2. Environmental Resilience Institute, Bloomington 47405, IN

9

10 # Corresponding author: [devsingh@iu.edu](mailto:devsingh@iu.edu), [ketterso@indiana.edu](mailto:ketterso@indiana.edu)

11

12 **Running title:** Latitudinal cline in seasonal reproduction

13

14 **Key words:** Dark eyed Junco, seasonal reproduction, critical photoperiod, Life-history states,  
15 breeding latitude, stable hydrogen isotope, seasonality

16

17

18

19

20

21

22

23 **Abstract**

24 Many organisms time reproduction to photoperiod, a constant from year to year. Predicting how  
25 anthropogenic change will influence future timing demands greater knowledge of the current role  
26 of photoperiod. We held two closely related bird populations in a common environment. One  
27 population is resident; the other winters in sympatry with the resident population but migrates  
28 north prior to reproducing. We increased photoperiod gradually and measured preparation for  
29 migration and reproduction, using feather stable isotopes to estimate breeding latitude. We  
30 predicted population differences in the minimum stimulatory day length to elicit a response  
31 (CPP, critical photoperiod) and co-variation between CPP and distance migrated. We found clear  
32 population differences in CPP and greater CPP in longer distance migrants. We conclude that  
33 current geographic variation in reproductive timing has a genetic or early developmental basis  
34 and recommend that future research focus on how anthropogenic changes will interact with CPP  
35 to adjust timing of reproduction and migration.

36

37

38

39

40

41

42

43

44

45

46 **Introduction**

47       Animals across the globe follow the seasons and match their growth, development, gonadal  
48       recrudescence, migration, and other seasonal life-history states to exploit the seasons most  
49       favorable for survival and reproduction (Wingfield et al., 1992; Dawson 2013). Birds breeding at  
50       different latitudes vary in duration and timing of seasonal life-history states to match breeding to  
51       periods when resources well-suited for nesting growth are abundant (Lack 1968; Visser et al.,  
52       2004). Different species depend on food supplies available at different times of the year, hence  
53       optimal timing varies by species and populations within species (Dawson and Goldsmith 1983;  
54       Wingfield et al., 1992; Dawson et al., 2001; Ball and Ketterson 2008; Watts et al., 2015). When  
55       there is a mismatch between food availability and the timing of breeding, nestling growth and  
56       survival can be compromised (Visser et al., 2004; Jonzén et al., 2006).

57       Individuals must prepare in advance to time their seasonal events to match the environment  
58       they occupy (Menaker 1971; Bradshaw and Holzapfel 2007). Photoperiod is the only consistent  
59       reliable cue for seasonally breeding animals and is predictable at a given latitude. Hence,  
60       changing photoperiod (i.e., day length) acts as the primary predictive cue to time seasonal  
61       phenological events such as migration and breeding (Rowan, 1926; Wingfield et al., 1992;  
62       Bronson and Heideman, 1994; Dawson 2001). In general, rate of gonadal maturation appears to  
63       be directly proportional to increasing day length (Farner and Wilson, 1957; Follett and Maung,  
64       1978). Photoperiodic responses depend on encephalic photoreceptors perceiving light during the  
65       stimulatory phase of a daily rhythm of sensitivity (Follett et al., 1992; Ball and Balthazart, 2003;  
66       Yasuo et al., 2003). Seasonally breeding animals that undergo annual gonadal recrudescence and  
67       regression in response to changing photoperiod as a primary predictive cue, also rely on  
68       supplementary cues to initiate and regulate timing of reproductive development (Bronson and  
69       Heideman, 1994; Dawson 2001; Wingfield 2012). Towards the end of the breeding season, many

70 bird species are no longer responsive to long days and are said to become photorefractory. They  
71 show a decline in gonad volume and reduced testosterone while days are still long, well before  
72 the return of short photoperiods during autumn (Burger, 1949; Miller, 1954). Exposure to short  
73 days during autumn is then required to break the photorefractory period and restore a bird's  
74 ability to undergo gonadal recrudescence in response to increasing photoperiod the following  
75 spring (Farner and Mewaldt, 1955). In short, seasonal phenology can be referred to in terms of  
76 the periodic appearance of life-history states consisting of a photosensitive state capable of  
77 responding to increasing photoperiod when encountered, a photostimulatory state that is induced  
78 by increasing day length, and a photorefractory state in which an animal is no longer responsive  
79 to long days.

80 Reproductive timing is driven by the hypothalamic-pituitary-gonadal (HPG) axis.  
81 Gonadotropin releasing hormone 1 (GnRH1) is released from the hypothalamus to stimulate  
82 release of the gonadotropins, luteinizing hormone (LH) and follicle-stimulating hormone (FSH),  
83 from the pituitary (Li et al., 1994; Cho et al., 1998). LH and FSH stimulate gonadal growth and  
84 development of gametes, as well as production and release of sex steroids. Injecting controlled  
85 doses of exogenous GnRH (i.e., a GnRH challenge) to individuals and measuring downstream  
86 activity of the HPG axis has been a successful tool to investigate variation in animals'  
87 physiological state and behavior (Jawor et al., 2006; Spinney et al., 2006; Grieves et al., 2016).

88 While much of this has been known for decades, significant knowledge gaps remain with  
89 respect to the specific mechanisms accounting for timing differences among populations that  
90 breed in different environments (Fudickar et al., 2016; Ramenofsky et al., 2017). We studied  
91 dark-eyed juncos (*Junco hyemalis*), a small songbird that consists of migratory and sedentary  
92 (i.e., resident) populations, some of which live in sympatry during the winter and early spring



93 (Fudickar et al., 2016; Grieves et al., 2016). Residents initiate preparation for reproduction prior  
94 to the departure of migrants for their breeding grounds. Following spring migration, migrant and  
95 resident juncos are geographically isolated for the remainder of the breeding season. Hence  
96 migrants and residents can be exposed to the same environment in spring but different  
97 environments during summer.

98 In a prior study, resident and migrant male juncos were held captive in a common garden  
99 and exposed to the same photoperiod programmed to match the natural increase in spring.  
100 Residents were found to increase cloacal protuberance volume (CPV; a primary sperm storage  
101 structure for male birds) earlier than migrants, i.e. at a shorter photoperiod (Fudickar et al.,  
102 2016). Here, we extend this study to examine changes in the reproductive axis during all four life  
103 history states and report differences in the critical photoperiodic threshold (CPP) in spring, as  
104 well as differences in the timing of breeding termination and attaining refractoriness. We  
105 predicted that migrants and residents held in a captive common environment in gradually  
106 increasing photoperiod would differ in the photoperiod at which cloacal protuberance (CPV),  
107 baseline testosterone ( $T_0$ ), and testosterone in response to GnRH challenge (dT) would increase  
108 in spring, with the CPP being lower in residents. We also predicted that residents would enter the  
109 photorefractory state later than migrants, thus prolonging the time when CPV,  $T_0$ , dT were  
110 elevated. We used stable hydrogen isotopes ratios ( $\delta^2H$ ) in feathers to estimate breeding latitude,  
111 which has been used as a proxy for determining variation in locations where feathers are grown  
112 (Rubenstein et al., 2002; Hobson 2003).

113 If our predictions were supported, we would conclude that population level variation in  
114 CPP and thus in timing has a genetic or early developmental basis, which would permit further  
115 investigation of the locus of variation in brain, gonad or periphery. If our predictions were not

116 borne out, i.e., migrants and residents did not differ in CPP in a common environment, this  
117 would suggest that timing is highly flexible regardless of migratory strategy or population of  
118 origin.

119

## 120 **Material and Methods**

### 121 ***Study Species***

122 The dark-eyed junco (*Junco hyemalis*) is a broadly distributed North American songbird (Nolan  
123 et al., 2002). Diversifying approximately 15,000 years ago, juncos subspecies vary in plumage  
124 coloration, reproductive timing, and migratory behavior (Atwell et al., 2011; Fudickar et al.,  
125 2016). Within this species complex, a migratory subspecies, *J.h. hyemalis*, (hereafter ‘migrants’)  
126 breeds in temperate coniferous and mixed forests across Canada and Alaska, whereas a sedentary  
127 subspecies, *J.h. carolinensis*, (hereafter, ‘residents’) is found year-round in Appalachian  
128 Mountains of the eastern United States. Following the fall migration, migrants overwinter in the  
129 United States east of the Rocky Mountains. Some migrant and resident subpopulations are found  
130 in overlapping distributions in the Appalachian Mountains during the winter; specifically, both  
131 migrants and residents are frequently caught foraging in mixed flocks in the winter at Mountain  
132 Lake Biological Station, in Pembroke, VA (Nolan, 2002).

### 133 ***Bird Capture and Housing***

134 Between November 1 to December 5, 2017 male overwintering migratory dark-eyed juncos  
135 (n=45) were captured using mist nests from their overwintering sites in Bloomington, IN (39.16  
136 °N, 86.52°W). Additionally, sympatric resident (n=15) and migrants (n=15) male dark-eyed  
137 juncos were captured at University of Virginia’s Mountain Lake Biological Station in Giles  
138 County (37.37 °N, 80.52°W). Scientific collecting permits were issued by the Virginia

139 Department of Game and Inland Fisheries (permit # 052971), the Indiana Department of Natural  
140 Resources (permit# 1803), and the US Fish and Wildlife Service (permit # 20261). All methods  
141 were approved under protocol (# 15-026-17) by the Indiana University Institutional Animal Care  
142 and Use Committee.

143 Resident dark-eyed juncos are relatively bigger in body size, more uniformly colored, and  
144 heavier in body mass than migrants except during migration, when migrants store fat (Pyle,  
145 1997). We classified the subpopulations using plumage and bill coloration (pink bill, *J. h.*  
146 *hyemalis*; blue-gray bill, *J. h. carolinesis*: Nolan 2002). Age was determined by looking  
147 collectively at wing, plumage color, brown/black contrast in the iris of the eye and ossification of  
148 skull (Nolan 2002; Cristol et al., 2003). Sex was determined by measuring wing length and  
149 confirmed later by growth of cloacal protuberance. After capture, all the birds were transported  
150 to Kent Farm Research Station in Bloomington, Indiana and housed in outdoor aviary under  
151 natural day length, temperature and *ad libitum* food until December 15, 2017. On January 18,  
152 2018, we moved all birds to individual cages (61 x 46 x 46 cm and 46 x 46 x 46 cm) with *ad*  
153 *libitum* food and water. Migrants and residents were randomly distributed across three rooms for  
154 four months. After four months the birds were free-flying until the endpoint sampling at 16L  
155 photoperiod on July 31, 2018.

156

### 157 ***Feather Stable Hydrogen Isotopes***

158 The most distal secondary feather of the right wing was collected from each individual at the  
159 time of capture for analysis of  $\delta^2\text{H}$ . After collection, feathers were cleaned, cut from most distal  
160 end, weighed to approximately 0.5 mg, and placed into a 3 x 5-mm silver capsule, and mailed for  
161 further quantification of  $\delta^2\text{H}$  to the US Geological Survey Stable Isotope Lab in Denver, CO.

162  $\delta^2\text{H}$  values were measured using established methods of mass spectrometry (Wunder et al., 2012;  
163 Fudickar et al., 2016). The  $\delta^2\text{H}$  ratios were reported in parts per mil notation (‰) with respect to  
164 VSMOW (Vienna Standard Mean Oceanic Water) using internal standards. We used North  
165 American  $\delta^2\text{H}$  precipitation map for August (<http://wateriso.utah.edu/waterisotopes/index.html>)  
166 for the schematic representation of junco  $\delta^2\text{H}$  values (Fig. 1 a). The  $\delta^2\text{H}$  values were used as a  
167 continuous variable against all the physiological and hormone measures. To analyze latitudinal  
168 differences in the CPP for physiological responses, we created two subjective groups within  
169 migrants for analysis: high latitude migrant (HLM; -141‰ to -90‰), low latitude migrants  
170 (LLM; -88‰ to -30‰). The values for low latitude migrants were similar to those of residents  
171 (Fig. 1 b).

172

### 173 ***Experimental Design and Sample Collection***

174 In order to determine differences in gonadal recrudescence and migration-related physiological  
175 changes between residents and migrants in response to increasing photoperiod, we artificially  
176 regulated changes in day length. Photoperiod was increased every twelve days from January 18  
177 to May 6 in the following schedule: 9L:15D, 10L:14D, 11L:13D, 11.4L:12.6D, 11.75L:12.25D,  
178 12L:12D, 12.4L:11.6D, 12.75L:11.25D, 13L:11D, 15L:9D, 16L:8D. After May 6, day length  
179 remained the same until the end of the experiment on July 31, 2018. Birds were processed for  
180 physiological measurements and bled after experiencing three days in each photoperiod till 15L.  
181 Under 16L of day length, all physiological measurements except bleeding were continued until  
182 the birds regressed their CP after experiencing 40 days in 16 L. At the end of period at 16L day  
183 length, all the birds were bled to measure  $T_0$  and dT in photorefractory state.

184

## 185 ***Morphological Measurements***

186 During each sampling, we measured other indicators for preparation for reproduction and  
187 migration, including subcutaneous fat score (FS), cloacal protuberance volume (CPV) and body  
188 mass (BM) (Fudickar et al., 2016; Greives et al., 2016). Cloacal protuberance volume (CPV) is  
189 used as a measure of spermatogenesis, sperm storage and gonadal growth during the breeding  
190 season in males (Wolfson 1952). Volume of the CP was estimated using the equation for the  
191 volume of a cylinder,  $V = \pi(\text{radius})^2\text{Height}$  (Schut et al., 2012). Postnuptial (pre-basic) molt was  
192 scored at the end of the experiment based on primary, secondary, and head feathers in both the  
193 populations. Each region was given a score from 1-10 depending on the extent of molting  
194 feathers: no molt as 0 (0%), light molt (1-10%), moderate molt (11-50%) and heavy molt (51-  
195 100%). The percentages were summed to generate a total molt score for each bird (modified  
196 from Ramenofsky et al., 2017).

## 197 ***Blood Sample Collection and Testosterone Hormone Assays***

198 Immediately after capturing a bird from its cage, we took a 100  $\mu\text{l}$  of blood sample by puncturing  
199 the alar wing vein for baseline testosterone ( $T_0$ ). Birds then received an intrapeitoral muscle  
200 GnRH injection ( $\sim 50 \mu\text{l}$ ) (chicken GnRH, American peptide, Sunnyvale, CA) dissolved in PBS  
201 vehicle, which is known to activate the HPG axis in juncos (Wingfield et al., 1979; Jawor et al.,  
202 2006; Greives et al., 2016). Thirty minutes following the GnRH injection a second blood sample  
203 (50  $\mu\text{l}$ ) was taken from the wing vein to measure GnRH-challenged testosterone ( $T_{30}$ ) levels.  
204 Birds were kept in an opaque bag between injections to reduce stress. After collection, blood  
205 samples were immediately processed to extract plasma and stored at  $-20^\circ\text{C}$  until assayed for  
206 testosterone.

207 We determined  $T_0$  and  $T_{30}$  concentration from 20  $\mu\text{l}$  plasma aliquots following established

208 methods for our species (Jawor et al., 2006; Fudickar et al., 2016), using high sensitivity  
209 testosterone kits (Enzo Life Sciences, ADI-900-176, Farmingdale, NY) to determine circulating  
210 levels of  $T_0$  and  $T_{30}$ . The GnRH induced testosterone level (dT) was calculated by subtracting  $T_0$   
211 from  $T_{30}$ . All samples were measured in duplicate and randomized over forty plates. The intra-  
212 plate and inter-plate coefficient of variation were  $6.77\% \pm 2.07\%$  (mean  $\pm$  SE) and 13.7%  
213 respectively.

214

### 215 *Statistical Analysis*

216 Data were analyzed using R (version 3.2.0). Differences in mean hydrogen isotope ratios ( $\delta^2\text{H}$ )  
217 between migrants and residents were determined using an unpaired Student's t-test of population  
218 means. We used a Box-cox test of transformation to determine the normal distribution of all the  
219 response variables (i.e.,  $T_0$ , dT, CPV, FS, and BW). We used a square root transformation for  
220 CPV and FS, a logarithmic transformation for  $T_0$  and dT, and no transformation for BW. To  
221 quantify whether day length, population, or the interaction between day length and population  
222 had a significant association with response variables, we used two-way analysis of variance (2-  
223 way ANOVA) followed by Tukey's post-hoc multiple comparison tests ( $\alpha < 0.05$ ).  
224 Considering repeated measures for the same individuals, we used a generalized liner mixed-  
225 effect model (GLMM) with day length and population as main effects, and age,  $\delta^2\text{H}$  as a  
226 covariate to determine effect of treatment on physiological responses. To find the critical  
227 photoperiod at which physiological parameters started to change, we used change point analysis  
228 (CPA) package in R (Killick and Eckley 2014; Robart et al., 2018). We used change point mean  
229 function which is based on the likelihood ratio and cumulative sum (CUSUM) test statistics. The  
230 CUSUM distribution does not assume data to be normally distributed and specified a single

231 change point.

232 To assess co-variation between  $\delta^2\text{H}$  values as a continuous variable and morphological  
233 and hormonal measurements, we combined migrants and residents and performed Pearson  
234 correlations for CPV, BW,  $T_0$ , dT, and molt score, and Spearman correlation for FS on one  
235 sampling date for each of four life-history states (LHSs): (1) photosensitive (9L, defined as  
236 beginning of experiment prior to recrudescence), (2) recrudescence (defined as the date of  
237 change point for CPV and dT), (3) photostimulatory, (defined as the date of seasonal peak values  
238 at 15L), and (4) photorefractory, (defined as the date of lowest seasonal value, 16L endpoint).  
239 We also calculated these correlations for migrants only on these same dates.

240

## 241 **Results**

### 242 **Hydrogen Isotope Values for Migrants and Residents**

243 There was a large range in the individual  $\delta^2\text{H}$  values in migrants (lowest  $\delta^2\text{H} = -141\text{‰}$ , highest  
244  $\delta^2\text{H} = -33\text{‰}$ ) in comparison to resident juncos (lowest  $\delta^2\text{H} = -81\text{‰}$ , highest  $\delta^2\text{H} = -37\text{‰}$ ;  
245 except one outlier that had  $\delta^2\text{H} = -109\text{‰}$ ). Mean  $\delta^2\text{H}$  differed significantly between resident and  
246 migrant juncos ( $p < 0.0001$ ; Student's t-test). Mean  $\delta^2\text{H}$  isotope was significantly lower in  
247 migrants than in residents (migrants mean  $\delta^2\text{H} = -104.9\text{‰}$ , residents mean  $\delta^2\text{H} = -58\text{‰}$ ; Fig. 1  
248 c).

249

### 250 **CPP for Gonadal Recrudescence in Migrants and Residents**

251 CPV varied significantly by day length ( $F_{13, 663.38} = 66.3716$ ,  $p < 0.0001$ ), population ( $F_{1, 663.38} = 23.0848$ ,  $p < 0.0001$ ), and the interaction between day length and population ( $F_{13, 663.43} = 7.1168$ ,  $p < 0.0001$ ; Fig. 2 a; Table 1). The change point analysis showed CPP to be lower for

254 gonadal recrudescence in residents than migrants. Growth in CPV in residents was detected at  
255 12.4 h of day length, whereas migrants did not exhibit significant growth of CPV until 13 h of  
256 day length (Fig. 2 a).  $T_0$  also varied significantly with day length ( $F_{13, 659.60} = 12.417$ ,  $p < 0.0001$ )  
257 and the interaction between day length and population ( $F_{13, 659.64} = 1.9205$ ,  $p = 0.02521$ ), but  
258 there was no effect of population (Fig. 2 b; Table 1). Change point analysis showed no CPP for  
259  $T_0$ . The variable dT varied with day length ( $F_{13, 663.29} = 62.786$ ,  $p < 0.0001$ ), population ( $F_{1, 52.11} =$   
260  $45.5151$ ,  $p < 0.0001$ ), and the interaction between day length and population ( $F_{13, 663.34} = 5.5765$ ,  
261  $p < 0.0001$ ; Fig. 2 c; Table 1). The effect of the co-variate  $\delta^2\text{H}$  was close to significance ( $F_{1, 51.94}$   
262  $= 3.9416$ ,  $p = 0.0524$ ). Similar to CPV response, residents showed earlier dT elevation at 11 h of  
263 day length, whereas migrants were delayed by 1h to 12 h of day length (Fig. 2 c). Comparing dT  
264 between HLM, LLM and Residents showed no difference. Interestingly, LLM elevated dT at  
265 11.4 h of day length which differed from migrants originating from higher latitudes (Fig. 2 d).  
266 Age did not show any variation in any physiological response.

267

### 268 **CPP for Fat score and Body mass**

269 Migrants showed increase in pre-migratory fat score with increasing day length ( $F_{13, 662.52} =$   
270  $25.8556$ ,  $p < 0.0001$ ) in comparison to resident birds which did not fatten ( $F_{1, 51.99} = 9.9204$ ,  $p =$   
271  $0.0027$ ). There was also a significant interaction between day length and population ( $F_{13, 662.57} =$   
272  $9.1958$ ,  $p < 0.0001$ ; Fig. 1 e, Table 1). At the beginning of the experiment, residents had higher  
273 body mass than migrants due to their larger body size. Migrant body mass increased significantly  
274 with day length as they fattened ( $F_{13, 660.99} = 16.0132$ ,  $p < 0.0001$ ), and the interaction between  
275 day length and population was significant ( $F_{13, 661.02} = 16.9076$ ,  $p < 0.0001$ ; Fig. 2 f, Table 1).  
276 Change point analysis revealed CPP for body mass at 11.4 h of day length for migrants (Fig. 2 f);



277 resident birds did not change body mass as day length increased (Fig. 2 f).

278

279 **Life-history State Dependent Changes in Relationship of Phenology to Stable Isotope**  
280 **Values**

281 We examined LHS-dependent changes in the relationships among CPV, dT, BW, FS with  
282 respect to  $\delta^2\text{H}$  values, considering residents and migrant collectively (Fig. 3) and dT/BW  
283 relationship with  $\delta^2\text{H}$  values in migrants separately (Fig. 3).

284 *Migrants, residents, and stable isotope-* During the photosensitive state,  $\delta^2\text{H}$  values were  
285 significantly positively correlated with BW ( $r = 0.4184$ ,  $p = 0.0013$ ; Fig. 3c) and FS ( $r = 0.2695$ ,  
286  $p = 0.045$ ; Fig. 3 d), but not with CPV or dT (Fig. 3 a, b). During recrudescence, both CPV ( $r =$   
287  $0.647$ ,  $p < 0.0001$ ; Fig. 3 e) and dT ( $r = 0.4698$ ,  $p = 0.0006$ ; Fig. 3 f) showed significant positive  
288 correlation and BW ( $r = -0.3315$ ,  $p = 0.0126$ ; Fig. 3 g) and FS ( $r = -0.4752$ ,  $p = 0.0002$ ; Fig. 3 h)  
289 showed negative correlation with  $\delta^2\text{H}$  values at their respective change point day lengths.

290 When resident juncos reached their peak (the stimulatory phase),  $\delta^2\text{H}$  values were positively  
291 correlated with CPV ( $r = 0.3823$ ,  $p = 0.0043$ ; Fig. 3 i) and negatively correlated with BW ( $r = -$   
292  $0.273$ ,  $p = 0.0458$ ; Fig. 3 k), and FS ( $r = -0.4786$ ,  $p < 0.0001$ ; Fig. 3 l). However, when all the  
293 birds reached peak stimulation at 15L,  $\delta^2\text{H}$  values were not correlated with dT (Fig. 3 j). When  
294 the birds reached the refractory state, BW ( $r = 0.5657$ ,  $p < 0.0001$ ; Fig. 3 o) and dT ( $r = 0.334$ ,  $p$   
295  $= 0.0403$ ; Fig. 3 n) were positively correlated with  $\delta^2\text{H}$  values providing evidence for latitudinal  
296 variation in timing of reaching refractoriness. CPV and FS were no longer correlated with  $\delta^2\text{H}$   
297 values (Fig. 3 m, p).

298

299 *Migrants and stable isotopes-* Migrants with different  $\delta^2\text{H}$  values did not show any correlation

300 with dT and BW in the photosensitive state (Fig. 3 q). With respect to dT in migrants at 11.75 L  
301 (recrudescence; CPP for LLM), gonadal recrudescence was delayed in migrants with lighter  $\delta^2\text{H}$   
302 values ( $r = 0.3708$ ,  $p = 0.0201$ ) and there was no correlation between  $\delta^2\text{H}$  values and BW (Fig. 3  
303 r). When the migrants reached peak photostimulation, there was no correlation between  $\delta^2\text{H}$   
304 values and dT, BW (Fig. 3 s). Under the refractory state, comparison of migrant dT ( $r = 0.4452$ ,  
305  $p = 0.0155$ ) and BW ( $r = 0.3264$ ,  $p = 0.0426$ ) (Fig. 3 t) revealed a positive correlation with  $\delta^2\text{H}$   
306 values, providing evidence for  $\delta^2\text{H}$ -dependent difference in the timing of onset of refractoriness  
307 which occurred earlier with lower isotope values (i.e., proxy for higher latitude).

308

### 309 **Timing of molt, migrants and residents**

310 Finally, post-breeding molt score was negatively correlated with  $\delta^2\text{H}$  values during the refractory  
311 state (Primary molt:  $r = -0.4318$ ,  $p = 0.0008$ , Fig. 4 a, b; head molt:  $r = -0.3975$ ,  $p = 0.006$ ; Fig.  
312 4a-d). Relationship between dT levels, BW and molt score support that birds breeding at  
313 different latitudes also differ in the timing of refractoriness (Fig. 4; Fig. 5). Migrants did not  
314 show any significant correlation with  $\delta^2\text{H}$  values during the refractory state.

315

### 316 **Discussion**

317 We found that captive migrant and resident juncos held under naturally increasing photoperiod  
318 exhibited different critical photoperiods for gonadal recrudescence. Resident juncos exhibited  
319 earlier CPV growth and elevation in dT than migrants. Further, timing of elevated CPV and dT  
320 response were associated with latitude as estimated using stable  $\delta^2\text{H}$  values. Our findings thus  
321 provide evidence for population level variation in the timing of initiation and termination of  
322 breeding in a common environment as a function of latitude, when latitude is estimated using

323  $\delta^2\text{H}$  isotope. Termination of reproduction started earlier in migrants than residents, as indicated  
324 by earlier timing of post-breeding molt, concurrent with earlier decline in the dT levels.  
325 Assuming that birds return to their sites of origin, we can conclude that birds destined to breed at  
326 higher latitudes delayed onset of gonadal growth as a correlate of breeding later in the year after  
327 completing longer migrations. To our knowledge such continuous covariation between the  
328 timing of annual life-history states, photosensitive - recrudescence - stimulation, and  
329 refractoriness across different breeding latitudes has not been described previously in any bird  
330 species (Fudickar et al., 2016; Ramenofsky et al., 2017).

331

332 *Birds breeding at lower latitudes initiate preparation for reproduction earlier*

333 The natural history of reproductive timing has shown that birds species breeding at higher  
334 latitudes tend to breed later and terminate reproduction sooner. Additionally, within species,  
335 populations breeding at higher latitudes initiate egg laying later than closely-related populations  
336 found at lower latitudes (Baker 1938, Myers, 1955). Two independent studies investigating  
337 seasonal reproductive physiology in free living quail from two different locations differing by  $9^{\circ}$   
338 latitude showed a 2-3 week advance in egg laying date in birds breeding at lower latitudes  
339 (Genelly 1955; Anthony 1970). Another study from two independent labs in England ( $52^{\circ}\text{N}$ ) and  
340 California ( $37^{\circ}\text{N}$ ) showed maximum stimulated gonads earlier at lower latitudes corresponding  
341 to first egg laying dates (Dawson and Goldsmith 1982; Rothery et al., 2001).

342 With respect to migratory species, previous studies have related migratory distance and  
343 breeding latitude to reproductive timing in different bird species (Rubenstein et al., 2002,  
344 Fudickar et al., 2016), and numerous studies have shown that within species complexes,  
345 populations living at lower latitudes tend to have longer breeding seasons than those found at

346 higher latitude (Dawson and Goldsmith 1983; Dawson, 2013; Greives et al., 2016). But  
347 preparation for breeding begins prior to the beginning of breeding season as defined by first egg  
348 laying date. Gonadal recrudescence precedes reproduction and is associated with a rise in  
349 circulating testosterone.

350

351 *Latitude is directly proportional to critical photoperiod response for gonad recrudescence-*

352 There are a very few studies testing the difference in photoperiodic threshold as a prerequisite to  
353 initiate early gonadal recrudescence. Birds collected from three different latitudes ( $45^{\circ}$ ,  $57^{\circ}$ ,  $70^{\circ}$   
354 N) and maintained in a common garden set up where they were exposed to gradually increasing  
355 photoperiod showed earlier maturation in those from the lower latitude ( $45^{\circ}$ N), but not in other  
356 two groups of birds from higher latitudes (Silverin et al., 1993). A recent common garden study  
357 of two subspecies of white crowned sparrows (*Zonotichia leucophrys*), and dark-eyed juncos  
358 (*Junco hyemalis*) that differed in migratory strategy showed differential responses in sensitivity  
359 to increasing day length, which influences the induction and termination of breeding (Fudickar et  
360 al., 2016; Ramenofsky et al., 2017). Our results fill several gaps in knowledge about the  
361 differences in the critical photoperiod threshold of dark-eyed junco subspecies as they transition  
362 from photosensitivity to gonadal recrudescence, duration of the stimulatory phase and timing of  
363 attaining photorefractoriness.

364

365 *Birds breeding at higher latitude terminate reproduction sooner-*

366 The transition from the stimulatory to refractory state is signaled by molt (Hall and Fransson  
367 2000) and our results also revealed a difference between migrant and resident juncos in the  
368 timing of refractoriness. This compares to starlings held in captivity and exposed to photoperiods

369 simulating annual cycles at higher (52<sup>0</sup>N) and lower (9<sup>0</sup>N) latitude. The starlings showed earlier  
370 gonadal maturation in 9<sup>0</sup>N, but birds from both latitudes regressed their gonads at the same time  
371 (Dawson, 2013). In our study, towards the end of the experiment when all birds were on 16h  
372 photoperiod, high latitude migrants no longer responded to GnRH by elevating T, while residents  
373 and low latitude migrants continued to elevate T in response to GnRH. Further, the relationship  
374 between molt score and T in response to GnRH across latitude also showed that birds originating  
375 from higher latitudes became photorefractory earlier.

376

377 The observed difference in the pattern created by latitudinal variation in CPP and seasonal life-  
378 history states can provide a framework for testing how various climatic variables account for  
379 variation in seasonal timing of birds from different latitudes. The juncos with lighter  $\delta^2\text{H}$  delayed  
380 recrudescence, remained in breeding phase for a shorter period, and become refractory sooner,  
381 unlike the juncos with heavier  $\delta^2\text{H}$  which recrudesced earlier, had longer breeding periods and  
382 entered the refractory state later. In total our results point out towards latitudinal variation in the  
383 pace of life-history states and the mechanisms underlying seasonal changes in the responsiveness  
384 of HPG axis.

385 Seasonal life-history states and associated phenology have long been studied, but are currently  
386 receiving renewed attention in the context of global climate change. In the temperate zone,  
387 photoperiod, temperature, and other environmental variables often correlate with seasonal  
388 phenology across latitude. As, a consequence, the study of species-specific seasonal phenology  
389 has strong application in the context of global climate change (Schwartz 2003, Parmesan 2006).  
390 Fitness for a seasonal animal involves not only the ability to synchronize behavior and  
391 physiology to the seasons but also to anticipate, prepare, and cope with the changing seasons. For

392 migratory birds, there is an additional challenge of identifying the optimal time to initiate  
393 migration and recrudescence gonads while living at locations distant from their breeding locations.  
394 For example, warmer winters are resulting in earlier springs. As a consequence, migrants that  
395 arrive at times that were formerly optimal find that peak food availability for rearing offspring  
396 has already passed, leading to mismatches between migration schedules and optimal times to  
397 breed (Lack 1968; Visser et al., 2004). Some long-distance migratory bird species have advanced  
398 their spring arrival dates in response to climate change, but others have not and arrived too late  
399 for the pulse of insect food needed to nurture offspring (Visser et al., 2004; Jónzén et al., 2006).  
400 Mismatch in the seasonal timing has significant consequences at the population level (Nussey et  
401 al., 2005; Both et al., 2006). Thus, knowing the mechanisms of life-history state-dependent  
402 phenology may help in predicting the effect of climate change on survival and fitness of species  
403 (Miller-Rushing et al., 2010).

404  
405 In order to estimate the ecological consequences of climate change we must be able to  
406 forecast the shifts in the direction, magnitude, and phase of phenological processes under  
407 different environmental scenarios. This forecasting is impeded due to a shortage of precise  
408 knowledge of the mechanisms determining the pace of life-history events. Phenology is a key  
409 process that reflects an organism's micro-evolutionary response to a wide range of  
410 environmental cues (van Asch et al., 2007). Animals distributed geographically across a wide  
411 range of photoperiod, temperature, and other environmental conditions that vary with latitude are  
412 known to express phenological events at different phases of the annual cycle. Hence, it is critical  
413 to incorporate mechanistic and evolutionary perspective while forecasting ecological  
414 consequences of climate change.

415 **Conclusions**

416 Our study demonstrates differences in seasonal timing across latitudes in response to changing  
417 photoperiod and reveals some of the underlying mechanisms and their potential for adaptive  
418 response to environmental change. Birds breeding at lower latitudes recrudesced earlier,  
419 maintained the stimulatory phase for longer, and attained refractoriness later. Whereas, birds  
420 originating at higher latitude delayed recrudescence, remained stimulatory for a shorter time, and  
421 attained refractoriness sooner. That is, latitude was directly proportional to the critical  
422 photoperiod required for recrudescence and inversely proportional to the timing of refractoriness.  
423 Particularly informative was a group of migrants that had  $\delta^2\text{H}$  similar to residents and an  
424 intermediate response in CPP and timing of refractoriness. This may indicate that migration  
425 delays reproduction, but the extent of the delay depends on how far a bird has to travel. The  
426 approach used in this study can be applied to other species in which populations that differ in  
427 where they breed are found in the same winter environment as they do or do not prepare to  
428 migrate. It will be interesting to learn whether their patterns resemble those seen in the junco.

429

430 **Declaration:** Authors have no conflict of interest.

431 **Authors' contribution:** DS and EDK conceived the idea. DS, SRR, AAK, and KAA carried out  
432 the experiment. CS performed the hydrogen stable isotope experiment and provided data. DS  
433 wrote the manuscript with the help of all authors. All authors approved the final draft.

434 **Acknowledgements:** The funds were provided by the Indiana University through the Grand  
435 Challenge Initiative, Prepared for Environmental Change to EDK. We thank Adam M. Fudickar  
436 for his suggestions during experimental design. We thank Cody Ross Philips and Zhenyue Tan  
437 from Indiana Statistics Consulting Center, IU Bloomington for statistical help. We thank Jesse  
438 Montoure, Izzy Krahling, Katie M. Talbott and Allison Byrd for helping in blood samplings and

439 molt scoring. We thank Nathan E. Fletcher for assistance with animal care during experiment.  
440 We thank David Sinkiewicz for providing access to the Center for Integrative Study of Animal  
441 Behavior (CISAB) lab facility.

442

### 443 **Figure legends**

444 **Figure 1.** Schematic diagram of the hydrogen isotope ( $\delta^2\text{H}$ ) precipitation map at different  
445 latitudes in North America during the months of July and August, Juncos undergo a pre-basic  
446 molt after breeding and their feathers incorporate stable hydrogen isotope signatures from their  
447 local environments (Rubenstein et al., 2002). Left panel represents the latitudinal distribution of  
448 dark-eyed juncos breeding range based on their feather  $\delta^2\text{H}$  (a). The bar graph represents mean  
449 difference in resident and migrant juncos' hydrogen isotopes. Values of  $\delta^2\text{H}$  on the Y-axis are  
450 represented as hollow circle for migrants, solid grey circle for LLM, and solid circle for  
451 residents. The alpha was set at 0.05 (b). Some of the individual migrants' overlap in isotope with  
452 residents (c). The bluish bill residents (*J.h. carolinensis*) (R;  $\delta^2\text{H}$ : -37 to -81) breed at lower  
453 latitudes and have heavier  $\delta^2\text{H}$  in comparison to pink bill migrants (*J.h. hyemalis*) which breed  
454 over a wide latitudinal range from south (low latitude migrants;  $\delta^2\text{H}$ : -30 to -88) to farther north  
455 (high latitude migrants;  $\delta^2\text{H}$ : -90 to -141). Have you double checked the numbers recently?

456

457 **Figure 2.** Latitudinal cline in critical photoperiod threshold for different seasonal physiological  
458 responses. Measurement of CPV (a),  $T_0$  (b), dT (c), FS (d), BW (e) in migrants (hollow circle)  
459 and residents (solid circle), and dT (f) in HLM (hollow circle), LLM (grey solid circle) and  
460 residents (solid circle) starting from 9 h of light to 16h of light. Y-axis represents the  
461 physiological parameters and X-axis represents increasing photoperiod in hours of day length



462 exposure. Each data point represents mean  $\pm$  SEM. Data were analyzed using a mixed-effect  
463 model with repeated measures for effects of day length, population, and interaction between day  
464 length and population. Statistical significance was defined by alpha  $<0.05$ . The arrow in the  
465 circle and above day length shows critical photoperiod threshold point in respective population,  
466 determined by change point analysis. The seasonal life-history states (LHSs) were defined as  
467 photosensitive (9L), recrudescence (CPV, 12.4L; dT, 11L), photostimulatory (15L), and  
468 photorefractory (16L) state.

469

470 **Figure 3.** Life history state dependent changes in the relationship between CPV, BW, FS and dT  
471 across latitude. Correlation between residents and migrants CPV,  $T_0$ , dT, BW, and FS against  
472  $\delta^2\text{H}$  as a constant variable in photosensitive (9L: initial point; a-d), recrudescence (12.4L:  
473 CPV/BW/FS and 11L: dT; critical photoperiod threshold, e-h), photostimulatory (15L: CPV, dT  
474 level at highest peak; i-l), and photorefractory (16L: endpoint; m-p) states. Correlation among  
475 migrants dT and BW against  $\delta^2\text{H}$  values across different LHSs (q-t). Pearson correlation was  
476 used for all physiological data except fat score which is an ordinal value. Spearman correlation  
477 was used for fat score ordinal data. X-axis represents the  $\delta^2\text{H}$  as a constant variable and Y axis  
478 represents individual data points for CPV, dT (hollow circles), BW, FS (solid circle). Statistical  
479 significance was defined by alpha  $<0.05$ . Linear regression line with 95% confidence interval  
480 (shaded area) represents significant correlation as solid line and dotted line for no significant  
481 correlation.

482

483 **Figure 4.** Latitudinal variation in timing of molt, dT, and BW during endpoint refractory state.  
484 Pearson correlation between BW/ primary molt score (a), BW/ head molt score (b), dT/primary

485 molt score (c), and dT/head molt score (d) against  $\delta^2\text{H}$  as a constant variable in 16 L  
486 photorefractory state. X-axis represents the  $\delta^2\text{H}$  as a constant variable and Y axis represents  
487 individual data points BW, dT (hollow circles), primary and head molt score (solid circle).  
488 Statistical significance was defined by alpha <0.05. Linear regression line with 95% confidence  
489 interval (shaded area) represents significant correlation as solid line and dotted line for no  
490 significant correlation.

491

492 **Figure 5.** Latitudinal cline in critical photoperiod (CPP) for gonadal recrudescence and pace of  
493 life history states. Schematic summary Figure showing the breeding latitude dependent response  
494 to different critical photoperiod (CPP) and difference in the pace of different life history states in  
495 dark eyed juncos. Left panel showing the CPP for cloacal protuberance and dT response across  
496 latitude (a). Right panel showing the latitude-dependent seasonal waveforms of different life  
497 history states derived from common garden experiment. Photosensitive juncos overwintering at  
498 the same latitude exposed to increasing day length in a common garden show divergence in the  
499 development of recrudescence, photostimulation and timing of attaining photorefractoriness.  
500 Residents (black solid line), Low Latitude Migrants (black dotted line), high latitude migrants  
501 (red dotted line) exhibit differences in CPP to initiate gonad recrudescence, reach stimulation and  
502 attain photorefractoriness. Residents breeding at lower latitudes reproduce earlier, maintain  
503 stimulatory phase for a longer period and undergo refractory state later. High and Low Latitude  
504 migrants delay recrudescence and reach peak stimulation later and undergo refractoriness sooner  
505 (b).

506 **Table 1.**

507 Factor (s) affecting different physiological responses (CPV, FS, BW,  $T_0$ , dT): Analysis of

508 variance table of type III with Satterthwaite approximation for degrees of freedom derived from  
509 linear mixed effects model. Number of asterisk (\*) denotes level of significance  $p < 0.05$ (\*),  $p$   
510  $< 0.001$ (\*\*),  $P < 0.0001$ (\*\*\*).

511

## 512 **References**

513 Anthony, R. (1970). Ecology and reproduction of California quail in southeastern Washington.  
514 *Condor*, 72, 276–287.

515

516 Atwell, J.W., O’Neal, D.M., & Ketterson, E.D. (2011). Scientific research agenda: animal  
517 migrations as a moving target for conservation: intra-species variation and responses to  
518 environmental change, as illustrated in a sometimes migratory songbird. *Environ. Law*,  
519 41, 289–655.

520

521 Baker, J.R. (1938). The relation between latitude and breeding seasons in birds. *Proc. Zool. Soc.*  
522 *London Series A*, 108, 557–582.

523

524 Ball, G.F., & Balthazart, J. (2003). Birds return every spring like clockwork, but where is the  
525 clock? *Endocrinology*, 144, 3739–3741.

526

527 Ball, G.F., & Ketterson, E.D. (2008). Sex differences in the response to environmental cues  
528 regulating seasonal reproduction in birds. *Philos. Trans. R. Soc. B Biol. Sci.*, 363, 231–  
529 246.

530

- 531 Both, C., Bouwhuis, S., Lessells, C. M. & Visser, M. E. (2006). Climate change and population  
532 declines in a longdistance migratory bird. *Nature*, 441, 81–83.  
533
- 534 Bradshaw, W. E. & Holzapfel, C. M. (2007). Evolution of animal photoperiodism. *Annu. Rev.*  
535 *Ecol. Evol. Syst.*, 38, 1–25.  
536
- 537 Bronson, F. H., & P. Heideman. (1994). Seasonal regulation of reproduction in mammals.  
538 *Physiology of Reproduction*, 2, 541–584.  
539
- 540 Burger, J.W. (1949). A review of experimental investigations on seasonal reproduction in birds.  
541 *Wilson Bull.*, 61, 211–230.  
542
- 543 Cho, R.N., Hahn, T.P., MacDougall-Shackleton, S., & Ball, G.F. (1998). Seasonal variation in  
544 brain GnRH in free-living breeding and photorefractory House finches (*Carpodacus*  
545 *mexicanus*). *Gen. Comp. Endocrinol.*, 109, 244–250.  
546
- 547 Cristol, D. A., Reynolds E. Leclerc B., J. E., Donner A. H., Farabaugh C. S., & C. Ziegenfus W.  
548 S. (2003). Migratory dark-eyed juncos, *Junco hyemalis*, have better spatial memory and  
549 denser hippocampal neurons than nonmigratory conspecifics. *Animal Behaviour*, 66,  
550 317–328.  
551
- 552 Dawson, A. (2013). The effect of latitude on photoperiodic control of gonadal maturation,  
553 regression and molt in birds. *Gen. Comp. Endocrinol.*, 190, 129–133.

554

555 Dawson, A., & Goldsmith, A.R. (1983). Plasma prolactin and gonadotrophins during gonadal  
556 development and the onset of photorefractoriness in male and female starlings (*Sturnus*  
557 *vulgaris*) on artificial photoperiods. *J. Endocrinol.*, 97, 253–260.

558

559 Dawson, A., Goldsmith, A.R., & Nicholls, T.J. (1985). Development of photorefractoriness in  
560 intact and castrated male starlings (*Sturnus vulgaris*) exposed to different periods of long-  
561 day lengths. *Physiological Zoology*, 58, 253–261.

562

563 Dawson, A., King, V.M., Bentley, G.E., & Ball, G.F. (2001). Photoperiodic control of  
564 seasonality in birds. *J. Biol. Rhythms*, 16, 365–380.

565

566 Farner, D.S., & Mewaldt, L.R. (1955). The natural termination of the refractory period in white-  
567 crowned sparrows. *Condor*, 57, 112–116.

568

569 Farner, D.S., & Wilson, A.C. (1957). A quantitative examination of testicular growth in the  
570 white-crowned sparrow. *Biol. Bull.*, 113, 254–267.

571

572 Follett, B.K., Kumar, V., & Juss, T.S. (1992). Circadian nature of the photoperiodic clock in  
573 Japanese quail. *J. Compar. Physiol. A – Sensory Neur. Behav. Physiol.*, 171, 533–540.

574

575 Follett, B.K., & Maung, S.L. (1978). Rate of testicular maturation, in relation to gonadotrophin  
576 and testosterone levels, in quail exposed to various artificial photoperiods and to natural

577           daylengths. *J. Endocrinol.*, 78, 267–280.

578

579 Fudickar, A.M., Greives, T.J., Atwell, J.W., Stricker, C.A., & Ketterson, E.D. (2016).

580           Reproductive allochrony in seasonally sympatric populations maintained by differential

581           response to photoperiod: implications for population divergence and response to climate

582           change. *Am. Nat.*, 187, 436–446.

583

584 Greives, T.J., Fudickar, A.M., Atwell, J.W., Meddle, S.L. & Ketterson, E.D. (2016) Early spring

585           sex differences in luteinizing hormone response to gonadotropin releasing hormone in co-

586           occurring resident and migrant dark-eyed juncos (*Junco hyemalis*). *General and*

587           *Comparative Endocrinology*, 236, 17-23.

588

589 Hall, K. S. S. & Fransson, T. (2000). Lesser whitethroats under time-constraint moult more

590           rapidly and grow shorter wing feathers. *J. Avian Biol.*, 31, 583–587.

591

592 Hobson K.A. (2003). Making migratory connection with stable isotopes. In: *Avian Migration*

593           (Ed. By P. Berthold et al.), pp. 379–391. Berlin, Heidelberg: Springer-Verlag.

594

595 Jawor, J. M., McGlothlin, J.W., Casto, J. M., Greives, T. J., Snajdr, E. A., Bentley, G. E., et al.

596           (2006). Seasonal and individual variation in response to GnRH challenge in male

597           darkeyed juncos (*Junco hyemalis*). *General and Comparative Endocrinology*, 149, 182–

598           189.

599

- 600 Jonzén, N., Lindén, A., Ergon, T., Knudsen, E., Vik, J.O., Rubolini, D., et al. (2006). Rapid  
601 advance of spring arrival dates in long-distance migratory birds. *Science*, 312, 1959-  
602 1961.
- 603
- 604 Killick, R., & Eckley, I. (2014). Changepoint: An R Package for Changepoint Analysis. *Journal*  
605 *of statistical software.*, 58, 1-19.
- 606
- 607 Lack, D. (1968). Ecological Adaptations for Breeding in Birds. *Chapman & Hall, London.*
- 608
- 609 Li, Q., Tamarkin, L., Levantine, P., & Ottinger, M. (1994). Estradiol and androgen modulate  
610 chicken luteinizing hormone-releasing hormone-I release in vitro. *Biol. Reprod.*, 51, 896-  
611 903.
- 612
- 613 Menaker, M. (1971). Rhythms, reproduction and photoreception. *Biol. Reprod.*, 1, 295-308.
- 614
- 615 Miller-Rushing, A.J., Høye, T.T., Inouye, D.W. & Post, E. (2010). The effects of phenological  
616 mismatches on demography. *Phil. Trans. R. Soc. B*, 365, 3177-3186.
- 617
- 618 Miller, A.H. (1954). The occurrence and maintenance of the refractory period in crowned  
619 sparrows. *Condor*, 56, 13-20.
- 620
- 621 Myers, M.T. (1955). The breeding of the blackbird, song thrush and mistle thrush in Great  
622 Britain: part 1, breeding seasons. *Bird Study* 2, 2-24.

623

624 Genelly, R.E. (1955). Annual cycle in a population of California quail. *Condor*, 57, 263– 285.

625

626 Nolan Jr., V., Ketterson, E.D., Cristol, D.A., Rogers, C.M., Clotfelter, E.D., Titus, R.C., et al.

627 (2002). Dark-eyed Junco (*Junco hyemalis*). In: Poole, A. (Ed.), *The Birds of North*

628 *America Online*. Cornell Lab of Ornithology, Ithaca, NY.

629 <http://bna.birds.cornell.edu/bna>.

630

631 Nussey, D. H., Postma, E., Gienapp, P. & Visser, M. E. (2005). Selection on heritable

632 phenotypic plasticity in a wild bird population. *Science*, 310, 304–306.

633

634 Parmesan, C. (2006). Ecological and evolutionary responses to recent climate change. *Annu. Rev.*

635 *Ecol. Evol. Syst.*, 37, 637–669.

636

637 Pyle, P. 1997. Identification guide to North American birds. Slate Creek Press, Bolinas, CA.

638

639 Ramenofsky, M., Campion A.W., Pérez, J.H., Krause, J.S., & Németh, Z. (2017). Behavioral and

640 physiological traits of migrant and resident white crowned sparrows: a common garden

641 approach. *Journal of Experimental Biology*, 220, 1330-1340.

642

643 Rothery, P., Wyllie, I., Newton, I., Dawson, A., & Osborn, D. (2001). The timing and duration of

644 moult in adult Starlings *Sturnus vulgaris* in east-central England. *Ibis*, 143, 435–441.

645



- 646 Rowan, W. (1926). On photoperiodism, reproductive periodicity, and the annual migrations of  
647 certain birds and fishes. *Proc. Boston Soc. Nat. Hist.*, 38, 147-189.
- 648
- 649 Rubenstein, D.R., Chamberlain, C.P., Holmes, R.T., Ayres, M.P., Waldbauer, J.R., Graves, G.R.,  
650 & Tuross, N.C. (2002). Linking Breeding and Wintering Ranges of a Migratory Songbird  
651 Using Stable Isotopes. *Science*, 295, 1062-1065.
- 652
- 653 Robart, A.R., McGuire, M.M.K., & Watts, H.E. (2018). Increasing photoperiod stimulates the  
654 initiation of spring migratory behaviour and physiology in a facultative migrant, the pine  
655 siskin. *R. Soc. open sci.* 5, 180876.
- 656
- 657 Schut, E., Magrath, M.J.L., van Oers, K., & Komdeur, J. (2012). Volume of the cloacal  
658 protuberance as an indication of reproductive state in male Blue Tits *Cyanistes caeruleus*.  
659 *Ardea*, 100, 202-205.
- 660
- 661 Schwartz, M.D. (ed.) (2003). Phenology: an integrative environmental science. Norwell, MA:  
662 Kluwer Academic Publishers.
- 663
- 664 Silverin, B., Massa, R., & Stokkan, K.A. (1993). Photoperiodic adaptation to breeding at  
665 different latitudes in Great tits. *Gen. Comp. Endocrinol.*, 90, 14–22.
- 666
- 667 Spinney, L., Bentley, G., & Hau, M. (2006). Endocrine correlates of alternative phenotypes in  
668 the white-throated sparrow (*Zonotrichia albicollis*). *Horm. Behav.*, 50, 762–771.

669

670 van Asch, M., Tienderen, P.H., Holleman, L.J.M., & Visser, M.E. (2007). Predicting adaptation  
671 of phenology in response to climate change, an insect herbivore example. *Global Change*  
672 *Biol.*, 13, 1596–1604.

673

674 Visser, M. E., Both, C., & Lambrechts, M.M. (2004). Global climate change leads to mistimed  
675 avian reproduction. *Adv. Ecol. Res.*, 35, 89–110.

676

677 Watts, H. E., MacDougall-Shackleton, S. A., & Hahn, T. P. (2015). Variation among individuals  
678 in photoperiod response: Effects of breeding schedule, photoperiod, and age-related  
679 photoperiodic experience in birds. *J Exp Zool A Ecol Genet Physiol.*, 323, 368-374.

680

681 Wingfield, J.C., Crim, J.W., Mattocks, P.W., & Farner, D.S. (1979). Responses of photosensitive  
682 and photo-refractory male white-crowned sparrows (*Zonotrichia-leucophrys Gambelii*) to  
683 synthetic mammalian luteinizing hormone releasing hormone (Syn-LHRH). *Biol. Reprod.*,  
684 21, 801–806.

685

686 Wingfield, J.C., Hahn, T.P., Levin, R., & Honey, P. (1992). Environmental predictability and  
687 control of gonadal cycles in birds. *J. Exp. Zool.*, 261, 214–231.

688

689 Wingfield, J.C. (2012). Regulatory mechanisms that underlie phenology, behavior, and coping  
690 with environmental perturbations: an alternative look at biodiversity. *Auk* 129, 1-7.

691

692 Wolfson, A. (1952). The cloacal protuberance: a means for determining breeding condition in  
693 live male passerines. *Bird-Banding*, 23, 159-165.

694

695 Wunder, M.B., Jehl, J.R., & Stricker, C.A. (2012). The early bird gets the shrimp: confronting  
696 assumptions of isotopic equilibrium and homogeneity in a wild bird population. *Journal*  
697 *of Animal Ecology*, 81, 1223–1232.

698

699 Yasuo, S., Watanabe, M., Okabayashi, N., Ebihara, S., & Yoshimura, T. (2003). Circadian clock  
700 genes and photoperiodism: comprehensive analysis of clock gene expression in the  
701 mediobasal hypothalamus, the suprachiasmatic nucleus, and the pineal gland of Japanese  
702 quail under various light schedules. *Endocrinology*, 144, 3742–3748.

703

704

705

706

Figure 1

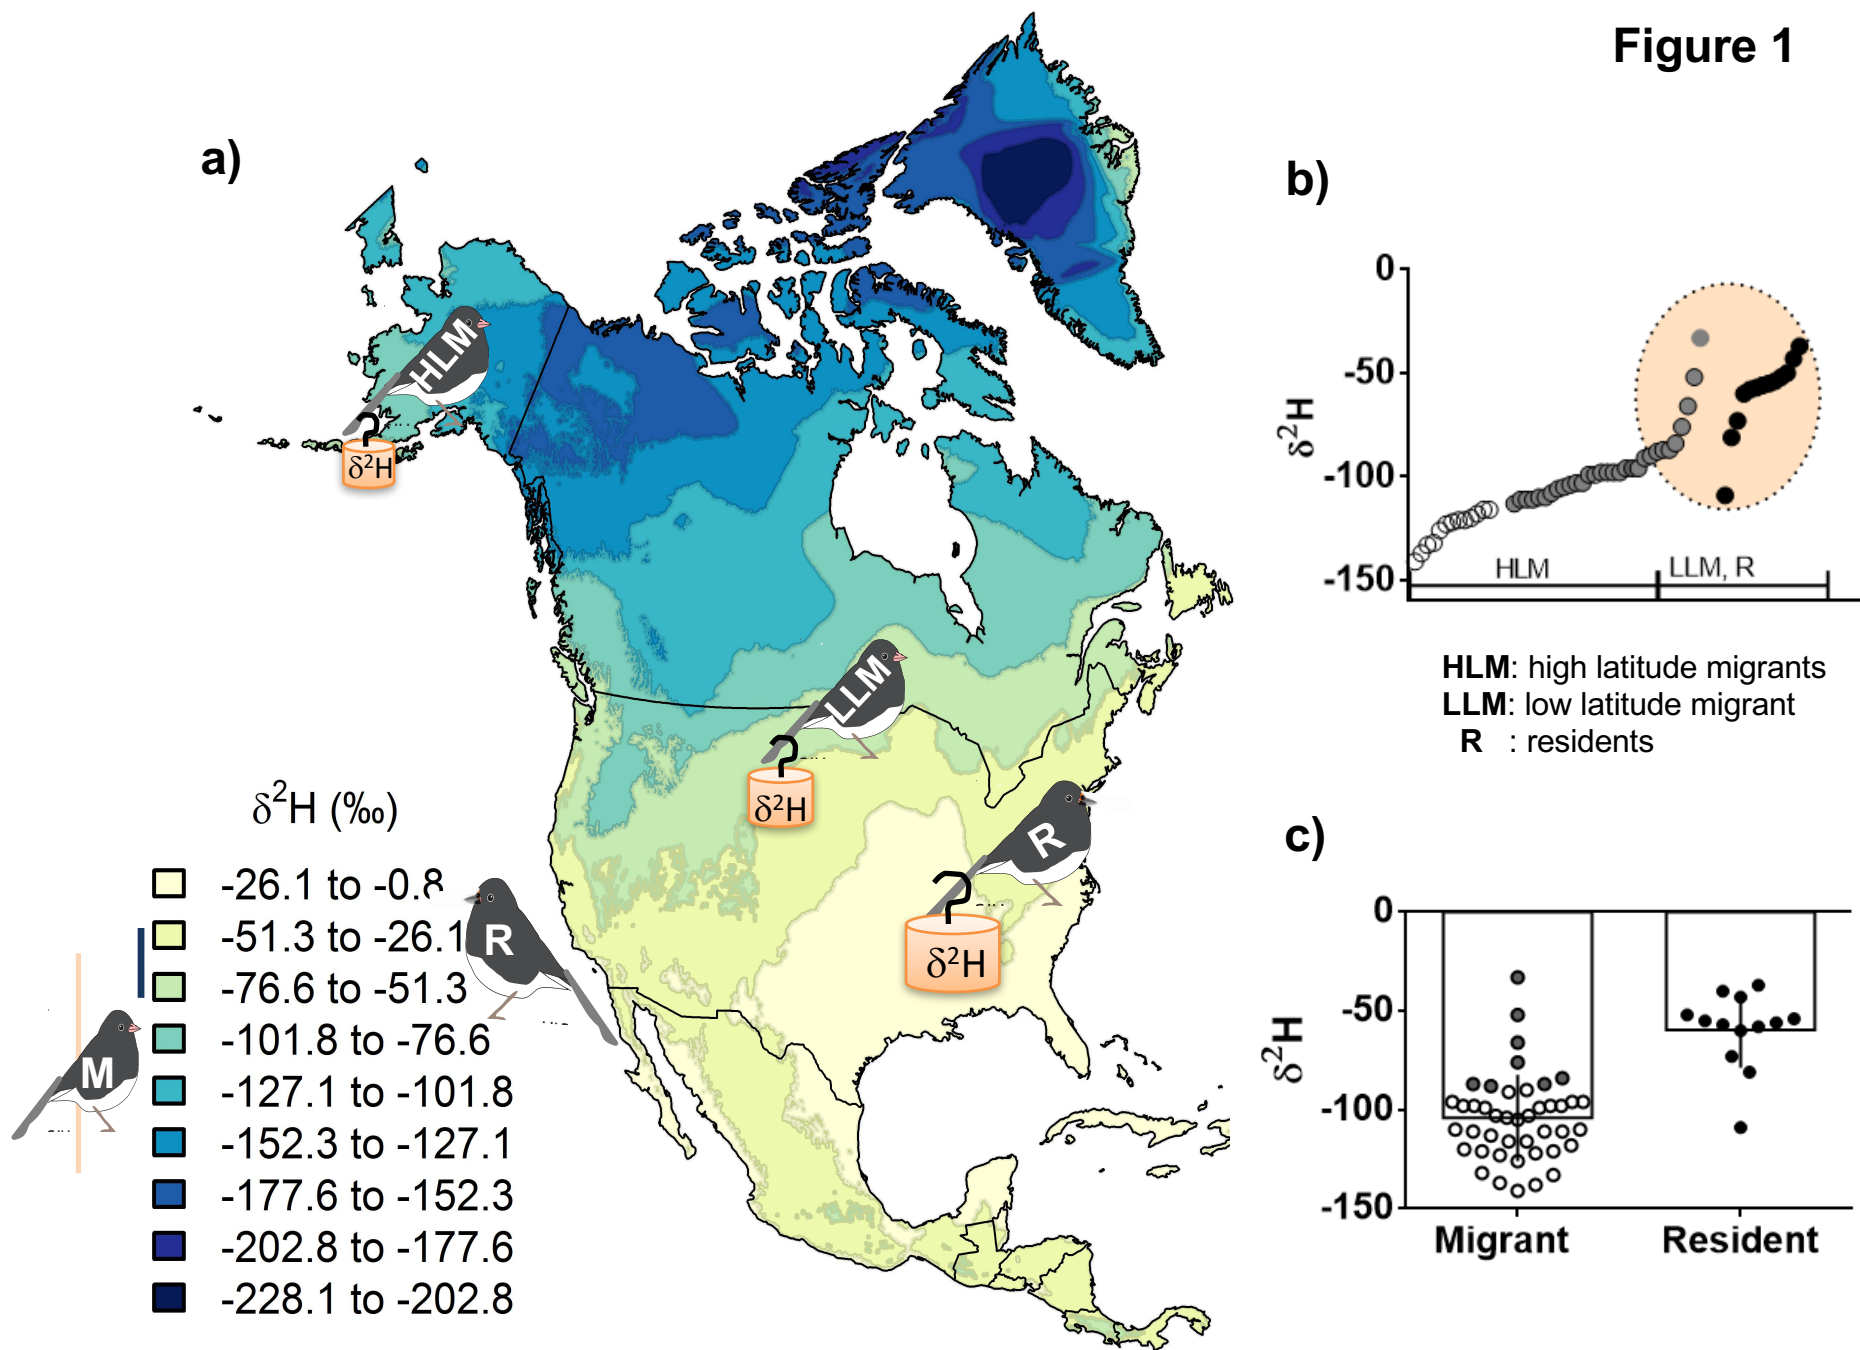

Figure 2

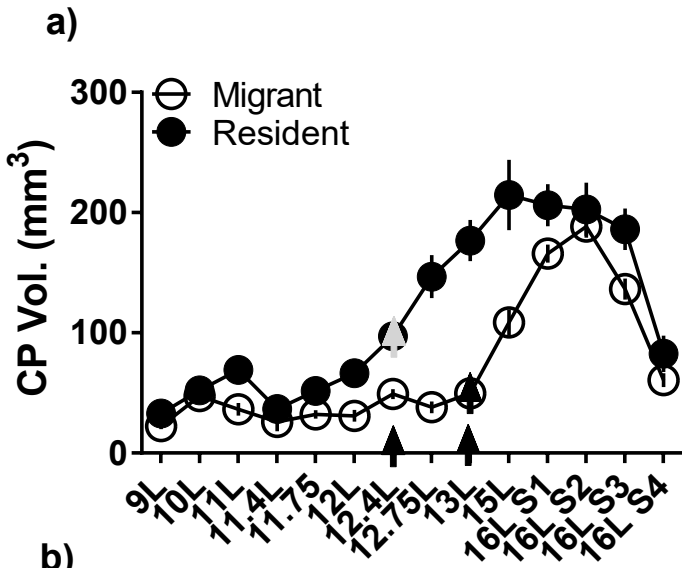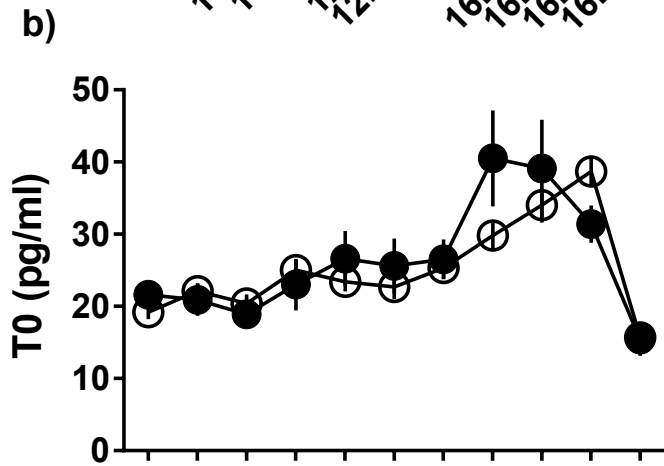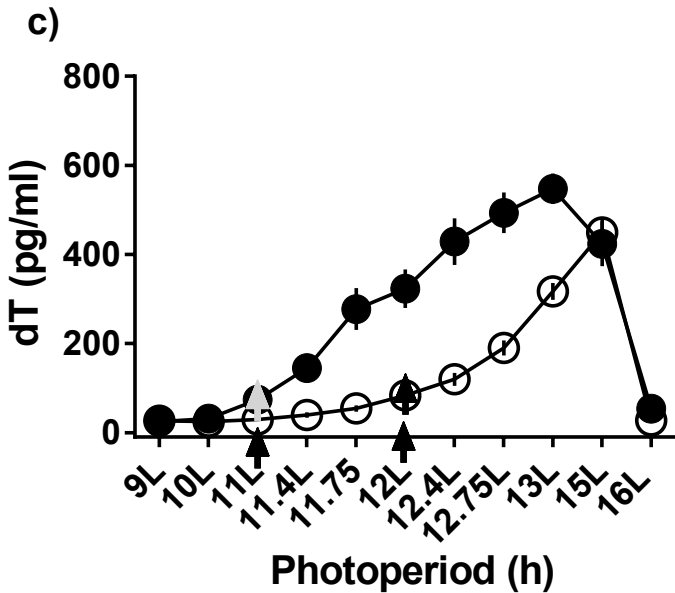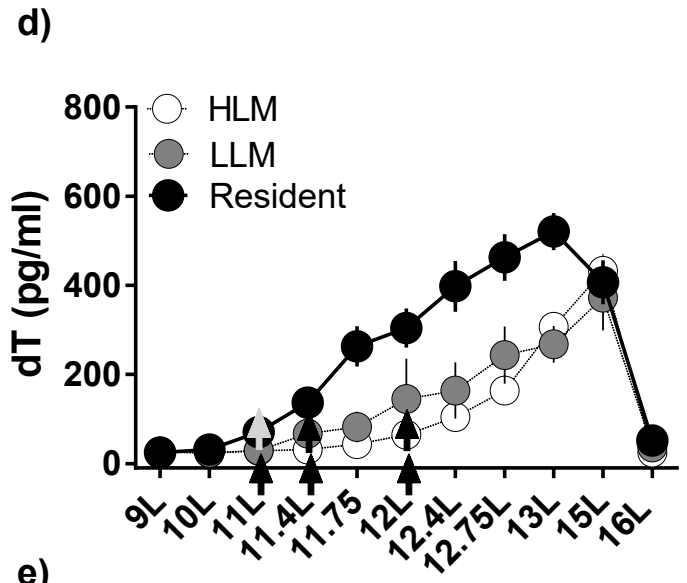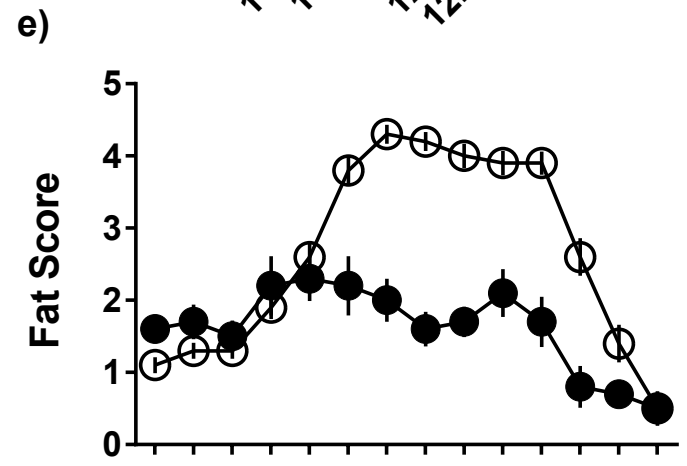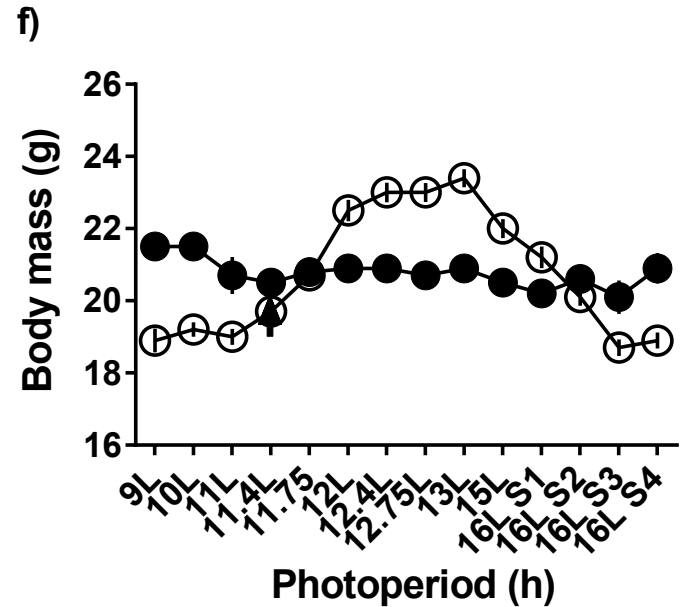

LHSs: [ Photosensitive: 9L; Recrudescence: 12.4L (CPV), 11L (dT), 11.4L (dT, LLM); Photostimulatory: 15L; Photorefractory: 16L ]

Figure 3

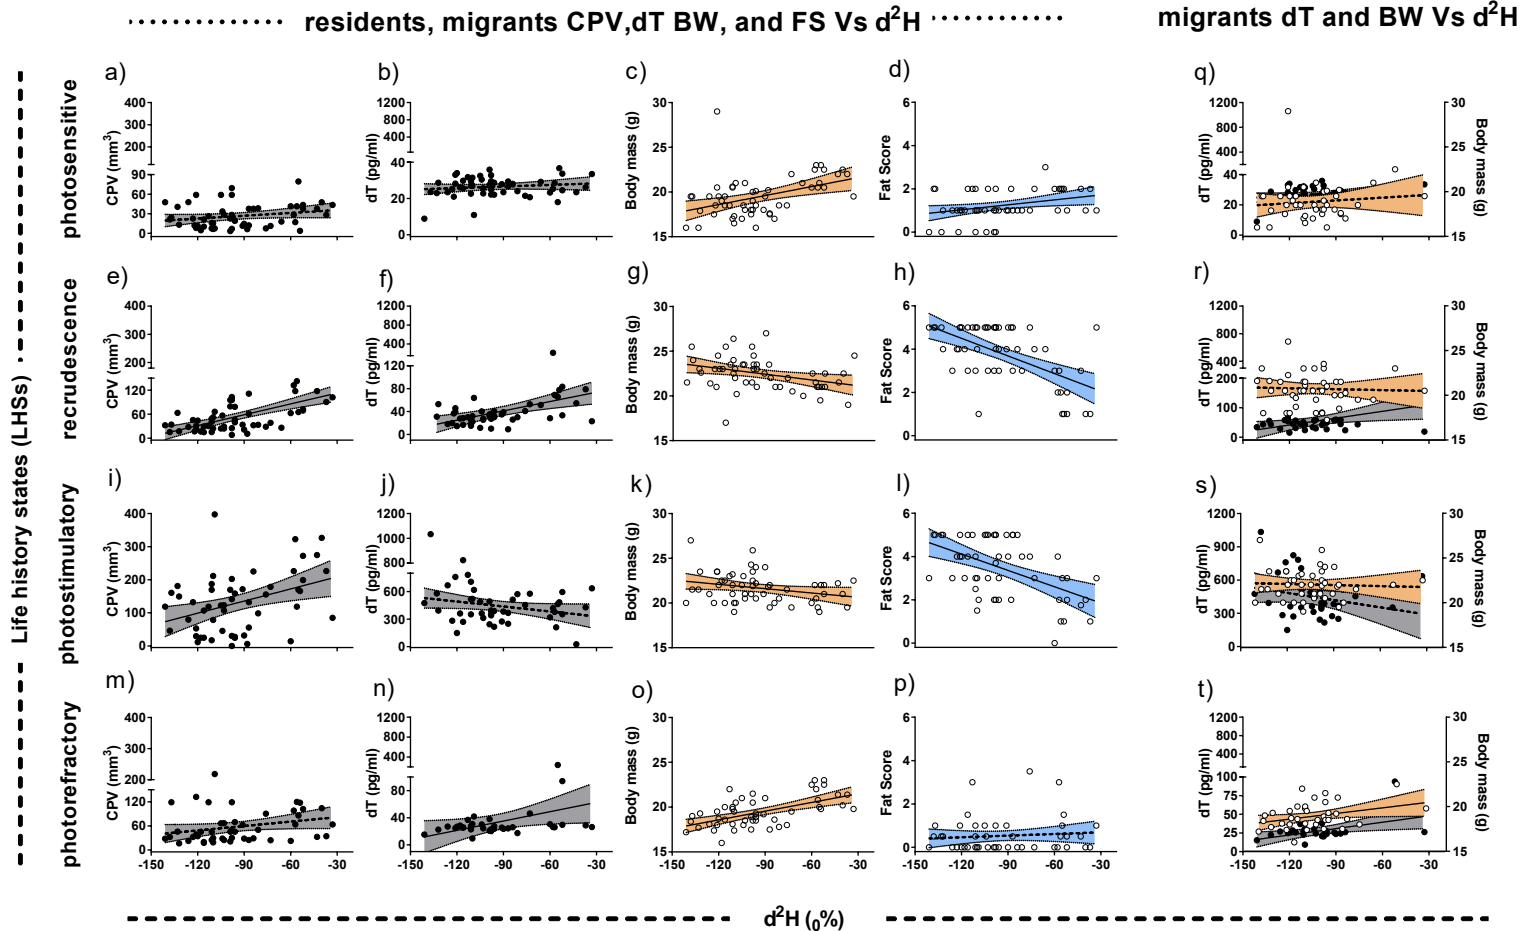

Figure 4

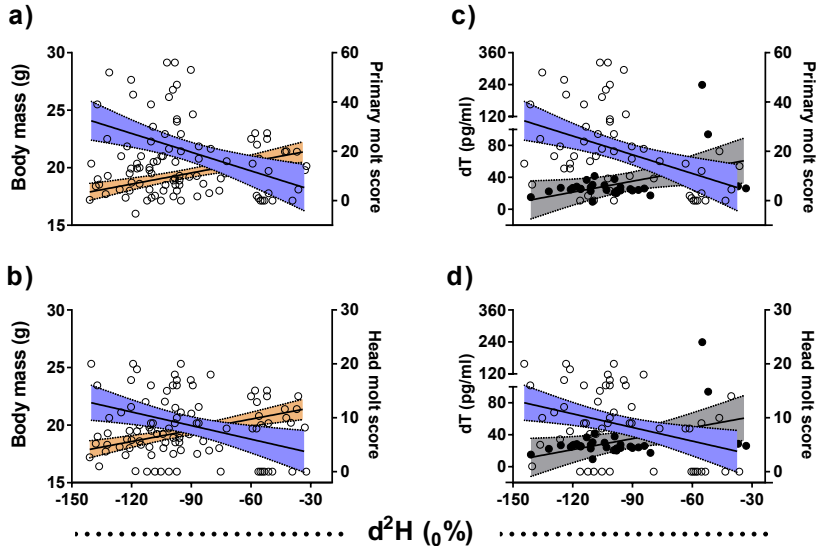

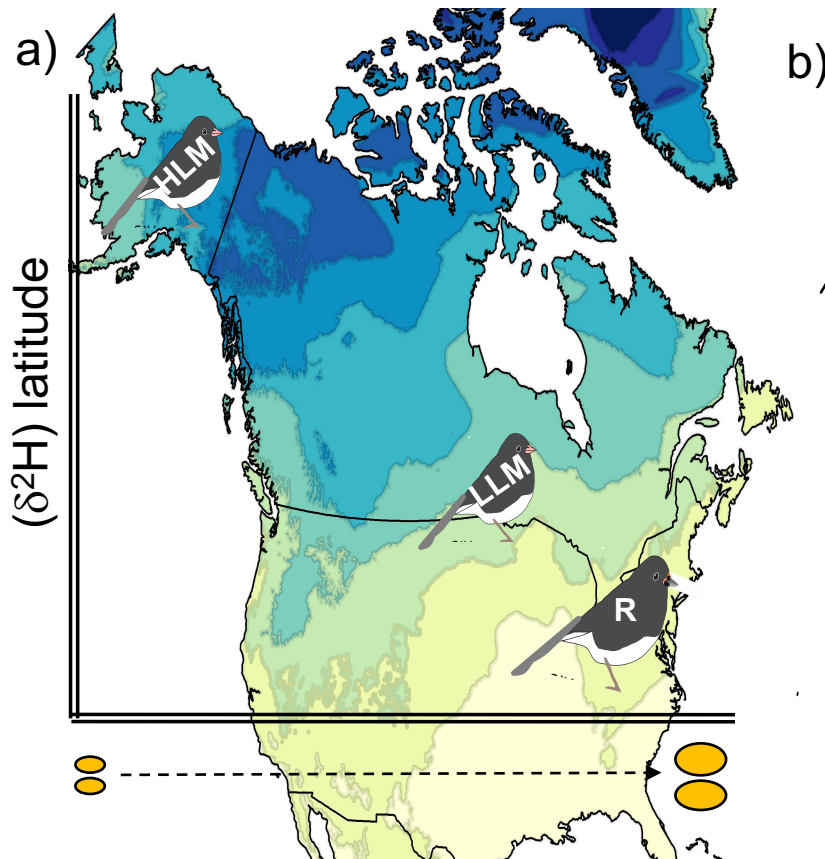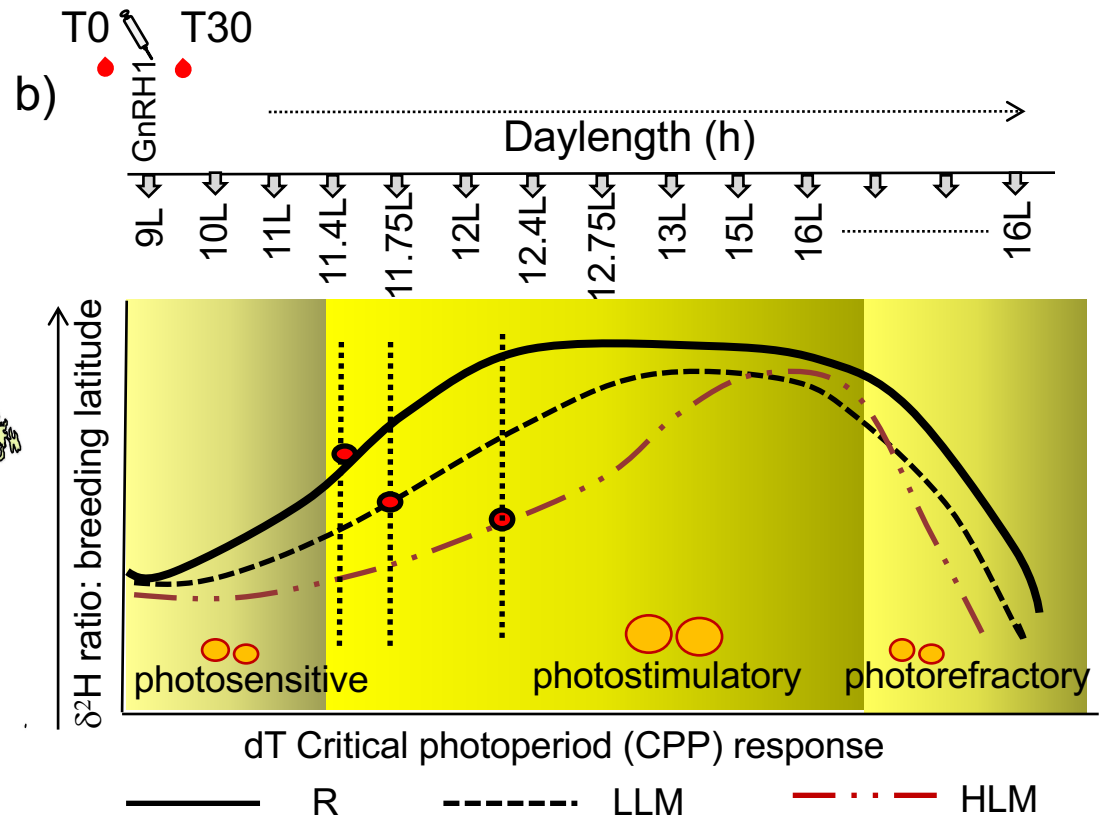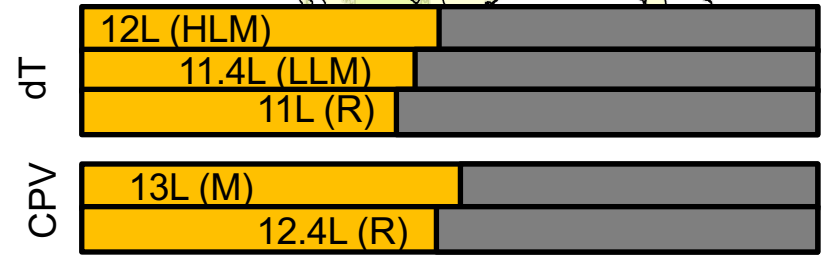

Critical photoperiod for dT and CPV response



**Table 1.**

| <b>CPV</b>         | Sum of Square | Mean Square | Numerator DF | Denominator DF | F-value | p-value                |
|--------------------|---------------|-------------|--------------|----------------|---------|------------------------|
| Day length(F1)     | 4361.7        | 335.52      | 13           | 663.38         | 66.3716 | <b>&lt;0.0001(***)</b> |
| Population (F2)    | 116.7         | 116.70      | 1            | 52.34          | 23.0848 | <b>&lt;0.0001(***)</b> |
| Age                | 2.1           | 2.13        | 1            | 266.93         | 0.4209  | 0.517                  |
| $\delta^2\text{H}$ | 12.5          | 12.48       | 1            | 52.16          | 2.4683  | 0.1222                 |
| F1 X F2            | 467.7         | 35.98       | 13           | 663.43         | 7.1168  | <b>&lt;0.0001(***)</b> |

  

| <b>T<sub>0</sub></b> | Sum of Square | Mean Square | Numerator DF | Denominator DF | F-value | p-value                |
|----------------------|---------------|-------------|--------------|----------------|---------|------------------------|
| Day length(F1)       | 20.0796       | 1.54459     | 13           | 659.60         | 12.4217 | <b>&lt;0.0001(***)</b> |
| Population (F2)      | 0.4149        | 0.41487     | 1            | 50.22          | 3.3364  | 0.07371                |
| Age                  | 0.0422        | 0.04220     | 1            | 516.23         | 0.3394  | 0.56043                |
| $\delta^2\text{H}$   | 0.1572        | 0.15717     | 1            | 49.94          | 1.2639  | 0.26628                |
| F1 X F2              | 3.1044        | 0.23880     | 13           | 659.64         | 1.9205  | <b>&lt;0.0252(*)</b>   |

  

| <b>dT</b>          | Sum of Square | Mean Square | Numerator DF | Denominator DF | F-value | p-value                |
|--------------------|---------------|-------------|--------------|----------------|---------|------------------------|
| Day length(F1)     | 313.023       | 24.0787     | 13           | 663.29         | 62.7863 | <b>&lt;0.0001(***)</b> |
| Population (F2)    | 17.455        | 17.4541     | 1            | 52.11          | 45.5151 | <b>&lt;0.0001(***)</b> |
| Age                | 0.439         | 0.4393      | 1            | 252.53         | 1.1455  | 0.2855                 |
| $\delta^2\text{H}$ | 1.512         | 1.5116      | 1            | 51.94          | 3.9416  | <b>0.0524</b>          |
| F1 X F2            | 27.802        | 2.1386      | 13           | 663.34         | 5.5765  | <b>&lt;0.0001(***)</b> |

| <b>FS</b>          | Sum of Square | Mean Square | Numerator DF | Denominator DF | F-value | p-value                |
|--------------------|---------------|-------------|--------------|----------------|---------|------------------------|
| Day length(F1)     | 58.464        | 4.4972      | 13           | 662.52         | 25.8556 |                        |
|                    |               |             |              |                |         | <b>&lt;0.0001(***)</b> |
| Population (F2)    | 1.726         | 1.7255      | 1            | 51.99          | 9.9204  |                        |
|                    |               |             |              |                |         | <b>0.00271(**)</b>     |
| Age                | 0.046         | 0.0460      | 1            | 333.71         | 0.2646  | 0.607325               |
| $\delta^2\text{H}$ | 0.052         | 0.0516      | 1            | 51.77          | 0.2969  | 0.588199               |
| F1 X F2            | 20.793        | 1.5995      | 13           | 662.57         | 9.1958  | <b>&lt;0.0001(***)</b> |

| <b>BW</b>          | Sum of Square | Mean Square | Numerator DF | Denominator DF | F-value | p-value                |
|--------------------|---------------|-------------|--------------|----------------|---------|------------------------|
| Day length(F1)     | 342.22        | 26.3247     | 13           | 660.99         | 16.0132 |                        |
|                    |               |             |              |                |         | <b>&lt;0.0001(***)</b> |
| Population (F2)    | 1.86          | 1.8597      | 1            | 52.05          | 1.1313  | 0.2924                 |
| Age                | 3.03          | 3.0307      | 1            | 594.55         | 1.8436  | 0.1750                 |
| $\delta^2\text{H}$ | 3.14          | 3.1420      | 1            | 51.75          | 1.9112  | 0.1728                 |
| F1 X F2            | 361.34        | 27.7951     | 13           | 661.02         | 16.9076 | <b>&lt;0.0001(***)</b> |
